# Supplementary material
Source: Springer Nature journal article supplement (https://www.springermedizin.de/resource/supplementary/13002_2010_215_MOESM1_ESM.pdf/9627484)

# Referral by traditional healer

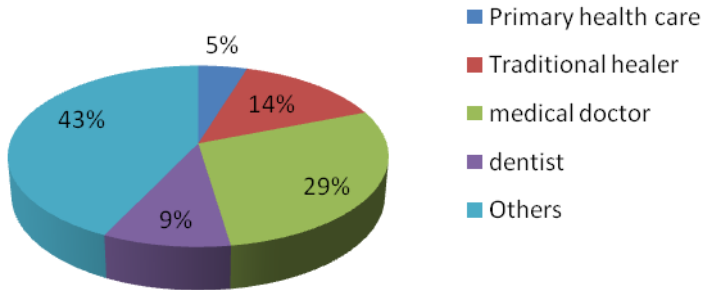

Supplement: MOESM1 [file 9627484]
